# Supplementary material
Source: PubMed Central journal article supplement (PMC5898394)
Supplement: NIHMS954840-supplement-Supplemental.pdf [file NIHMS954840-supplement-Supplemental.pdf]

## **Supporting Information**

### **An FTIR study of biochar ageing in soils**

B. Singh<sup>a</sup>, Y. Fang<sup>a</sup>, C.T. Johnston<sup>b</sup>

<sup>a</sup>Faculty of Agriculture and Environment, University of Sydney, Sydney, NSW 2006,  
Australia

<sup>b</sup>Crop, Soil and Environmental Science, Purdue University, IN 47907, USA

Corresponding author: Balwant Singh. Email: [Balwant.singh@sydney.edu.au](mailto:Balwant.singh@sydney.edu.au)

**Table S1** Band assignments of FTIR spectra of the two biochars (i.e. B450 and B550) and biochar amended soils

| Inceptisol |         |         | Oxisol |         |         | Entisol |         |         | Vertisol |         |         | Original biochar |      | Assignment                                             |
|------------|---------|---------|--------|---------|---------|---------|---------|---------|----------|---------|---------|------------------|------|--------------------------------------------------------|
| B0-D0      | B450-D0 | B550-D0 | B0-D0  | B450-D0 | B550-D0 | B0-D0   | B450-D0 | B550-D0 | B0-D0    | B450-D0 | B550-D0 | B450             | B550 |                                                        |
| 3697       | 3696    | 3697    | 3695   | 3696    | 3695    | 3696    | 3694    | 3696    |          | 3694    | 3696    |                  |      | v (OH) kaolinite                                       |
| 3649       | 3649    | 3649    |        |         |         |         |         |         |          |         |         | 3630             | 3639 | v (OH) kaolinite<br>v (OH) – clay minerals?            |
| 3620       | 3620    | 3623    | 3621   | 3620    | 3621    | 3620    | 3620    | 3617    | 3623     | 3620    | 3623    |                  |      | v (OH) smectite<br>v (OH) kaolinite and gibbsite       |
|            |         |         | 3527   | 3526    | 3527    |         |         |         |          |         |         |                  |      | v (OH) gibbsite                                        |
|            |         |         | 3445   | 3447    | 3445    |         |         |         |          |         |         |                  |      | v (OH) gibbsite                                        |
|            | 3356    | 3342    | 3377   | 3390    | 3393    | 3396    | 3396    | 3396    | 3379     | 3396    | 3379    | 3330             | 3384 | v (OH) sorbed water, clay and oxids<br>v (OH) gibbsite |
|            |         |         | 3379   | 3378    |         |         |         |         |          |         |         |                  |      | v (OH) sorbed water, v(NH)                             |
| 3062       |         | 3062    | 3051   |         | 3052    |         |         |         | 3056     | 3073    | 3056    | 3050             | 3050 | v (CH)-aromatic                                        |
|            | 2971    |         |        | 2968    |         |         |         |         | 2969     | 2968    | 2969    | 2965             |      | v (CH) asymm C-H stretch - aliphatic                   |
| 2923       | 2934    | 2924    | 2938   | 2928    | 2938    | 2934    | 2934    | 2934    | 2918     | 2931    | 2918    | 2920             | 2920 | v (CH) asymm C-H stretch - aliphatic                   |
|            | 2871    |         |        | 2871    |         |         |         |         |          | 2872    |         | 2867             |      | v (CH) symm C-H stretch - aliphatic                    |
| 2850       | 2849    | 2850    | 2850   | 2849    | 2850    | 2842    | 2849    | 2849    | 2847     |         | 2847    | 2840             |      | v (CH) symm C-H stretch - aliphatic                    |
|            |         |         |        |         |         |         | 2515    | 2520    |          |         |         |                  |      |                                                        |
|            |         |         |        |         |         |         | 1795    | 1795    |          |         |         |                  |      |                                                        |
| 1693       | 1698    | 1694    | 1691   | 1696    | 1691    |         |         |         | 1691     | 1692    | 1691    | 1692             | 1690 | v (C=O) - carboxylate                                  |
|            |         |         |        | 1610    |         |         |         |         |          | 1662    | 1659    |                  |      |                                                        |
| 1600       | 1602    | 1600    | 1597   |         | 1598    | 1585    | 1588    | 1585    | 1597     |         | 1597    | 1604             | 1593 | v (C=C) - aromatic                                     |
| 1438       |         | 1438    | 1442   | 1438    | 1442    | 1452    | 1454    | 1452    | 1441     | 1443    | 1442    | 1437             | 1443 | v (C-O) – v3 assymmetric stretch for calcite           |
| 1370       | 1375    | 1371    | 1374   | 1375    | 1374    |         |         |         | 1373     | 1378    | 1373    | 1370             |      |                                                        |
|            | 1318    |         |        | 1318    |         |         | 1318    |         | 1316     | 1318    | 1317    | 1315             |      | v (C-O) – v3 assymmetric stretch for whellite          |
|            | 1273    | 1273    |        | 1273    | 1273    | 1273    | 1273    | 1273    |          | 1270    | 1276    | 1275             | 1277 |                                                        |
|            |         |         | 1252   | 1253    | 1252    |         |         |         | 1248     | 1250    | 1249    |                  |      |                                                        |
| 1229       | 1236    | 1229    |        |         |         |         |         |         |          |         |         |                  |      |                                                        |
| 1163       | 1163    | 1164    |        | 1165    |         |         |         |         |          | 1171    | 1174    |                  |      |                                                        |
| 1107       | 1108    | 1107    | 1102   | 1106    | 1102    |         |         |         |          | 1111    | 1117    |                  |      |                                                        |
| 1033       | 1035    | 1034    | 1031   | 1035    | 1031    | 1032    | 1032    | 1032    | 1022     | 1027    | 1022    |                  |      |                                                        |
| 1011       | 1012    | 1011    | 1008   | 1015    | 1008    |         |         |         |          |         |         |                  |      |                                                        |
| 914        | 916     | 914     | 912    | 916     | 912     |         | 916     | 916     |          | 913     |         |                  |      |                                                        |
|            |         | 880     | 875    |         | 875     | 876     | 876     | 876     | 874      | 876     | 875     | 883              | 876  | Out of plane bend –v2 - calcite                        |
|            |         |         |        |         |         |         |         |         |          |         |         | 865              |      |                                                        |
|            |         |         |        |         |         |         |         |         | 818      |         | 818     | 820              |      |                                                        |
| 798        | 797     | 798     | 801    |         | 801     |         | 803     | 803     |          |         | 803     |                  |      |                                                        |
|            | 780     |         |        | 783     |         |         | 780     | 780     |          | 783     |         | 781              |      | Out of plane bend –v2 - whewellite                     |
| 755        | 757     | 755     | 753    | 754     | 753     |         |         | 749     | 755      | 760     | 755     | 760              |      |                                                        |
|            |         |         |        |         |         | 715     | 715     | 715     |          |         |         |                  |      |                                                        |
| 696        | 695     | 696     | 688    | 690     | 688     |         |         | 690     | 690      | 690     | 690     |                  |      |                                                        |

**Table S2** Ratio of the total CH stretching intensity of aromatic and aliphatic bands (Ar/Al) in the FTIR spectra of the light fractions (density < 1.8 g cm<sup>-3</sup>) of the control (B0) and biochar amended soils (B450 and B550) at day zero (D0), and after 6 (6M) and 12 months (12M) of incubation at 20 (20C), 40 (40C) and 60°C (60C) in the laboratory.

| Sample/treatment | Inceptisol | Oxisol | Entisol | Vertisol |
|------------------|------------|--------|---------|----------|
| B0_D0            | 0.033      | 0.015  | 0.032   | 0.020    |
| B0_6M_20C        | 0.029      | 0.022  | 0.031   | 0.014    |
| B0_6M_40C        | 0.033      | 0.022  | 0.029   | 0.020    |
| B0_6M_60C        | 0.037      | 0.014  | 0.024   | 0.018    |
| B0_12M_20C       | 0.032      | 0.019  | 0.027   | 0.009    |
| B0_12M_40C       | 0.034      | 0.035  | 0.031   | 0.014    |
| B0_12M_60C       | 0.030      | 0.016  | 0.037   | 0.004    |
| B450_D0          | 0.058      | 0.163  | 0.050   | 0.155    |
| B450_6M_20C      | 0.052      | 0.120  | 0.046   | 0.127    |
| B450_6M_40C      | 0.051      | 0.081  | 0.052   | 0.126    |
| B450_6M_60C      | 0.127      | 0.108  | 0.064   | 0.127    |
| B450_12M_20C     | 0.060      | 0.117  | 0.054   | 0.166    |
| B450_12M_40C     | 0.060      | 0.151  | 0.052   | 0.123    |
| B450_12M_60C     | 0.099      | 0.111  | 0.073   | 0.164    |
| B550_D0          | 0.103      | 0.705  | 0.076   | 0.599    |
| B550_6M_20C      | 0.103      | 0.461  | 0.094   | 0.887    |
| B550_6M_40C      | 0.125      | 0.680  | 0.090   | 0.983    |
| B550_6M_60C      | 0.177      | 0.600  | 0.099   | 1.236    |
| B550_12M_20C     | 0.126      | 0.668  | 0.084   | 1.072    |
| B550_12M_40C     | 0.250      | 0.667  | 0.103   | 1.065    |
| B550_12M_60C     | 0.338      | 0.712  | 0.149   | 1.373    |

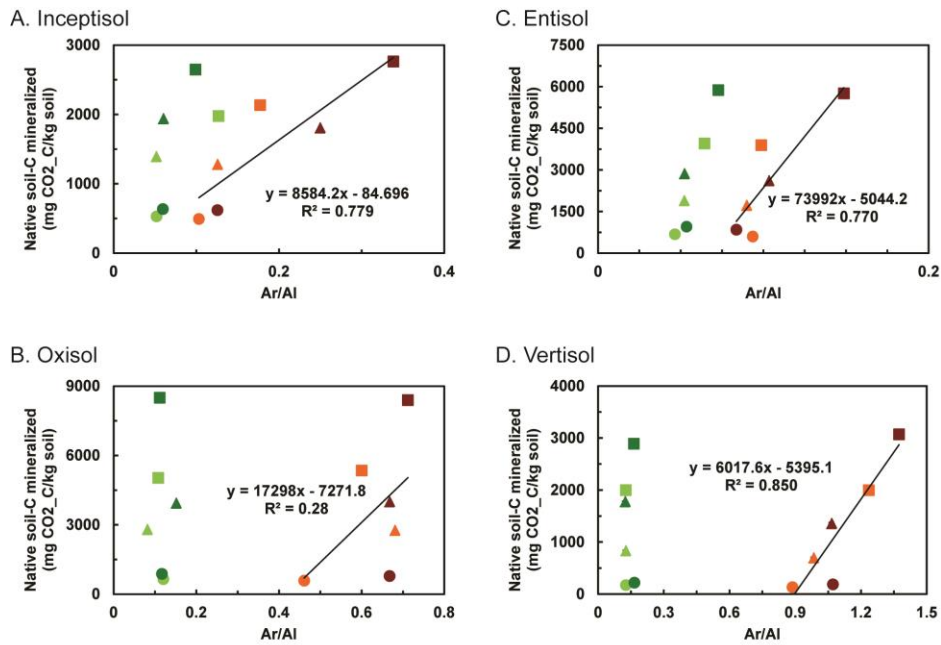

**Figure S1.** The cumulative amount of native soil-C mineralized (mg CO<sub>2</sub>-C kg<sup>-1</sup> soil) from soil-biochar mixtures after 6 and 12 months of incubation at 20, 40 and 60 °C plotted against the Ar/AI ratio of the light fraction for the four soils. Green color symbols are for the biochar produced at 450°C (B450) and brown color symbols are for the biochar produced at 550°C (B550). Circles, triangles and squares are for the samples incubated at 20 °C, 40 °C and 60 °C, respectively, and the lighter and darker shade of the color (green or brown) represent the samples incubated for 6 and 12 months, respectively.
